# Supplementary material for: Diabetic Pregnancy and Maternal High-Fat Diet Impair Mitochondrial Dynamism in the Developing Fetal Rat Heart by Sex-Specific Mechanisms
Source: MDPI journal article supplement (doi:10.3390/ijms20123090), 2019-06-25
Supplement: s1 [file s1]

**Table S1.** Primers and their target sequence

| Gene                | Manufacturer                | Ref Seq          | Assay ID                | Sequence                                                                                                                                                                                                                                                                                      |
|---------------------|-----------------------------|------------------|-------------------------|-----------------------------------------------------------------------------------------------------------------------------------------------------------------------------------------------------------------------------------------------------------------------------------------------|
| <b>Mfn1</b>         | Integrated DNA Technologies | NM_13897<br>6    | Rn.PT.58.44207<br>597   | Probe: 5'-/56-<br>FAM/cagcgttga/ZEN/ttccgagttgccca/3IABkFQ/-3'<br>P1: 5'-ccgctcattcaccttatggaa-3'<br>P2: 5'-gattgataagttctgccttgatgc-3'                                                                                                                                                       |
| <b>Mfn2</b>         | Integrated DNA Technologies | NM_13089<br>4    | Rn.PT.58.13375<br>660   | Probe: 5'-/56-<br>FAM/ccagctaga/ZEN/aacgagatgtccctgc/3IABkFQ/-3'<br>P1: 5'-ccatgtgtcgcttatccttct-3'<br>P2: 5'-tgactccagccatgtccat-3'                                                                                                                                                          |
| <b>Opa1</b>         | Integrated DNA Technologies | NM_13358<br>5    | Rn.PT.58.68588<br>53    | Probe: 5'-/56-<br>FAM/tcacatgcg/ZEN/ttgacactcgttccc/3IABkFQ/-3'<br>P1: 5'-tgttctctgagttcatggtctg-3'<br>P2: 5'-ctgagccaggttactccaaag-3'                                                                                                                                                        |
| <b>Drp1 (Dnm1l)</b> | Integrated DNA Technologies | NM_05365<br>5    | Rn.PT.58.35587<br>248   | Probe: 5'-/56-<br>FAM/cagtacccg/ZEN/catccatgagatcaagc/3IABkFQ/-3'<br>P1: 5'-aacccttcccatcaatacatcc-3'<br>P2: 5'-tccagagaggtagatccagatg-3'                                                                                                                                                     |
| <b>Mff</b>          | Integrated DNA Technologies | NM_00103<br>9015 | Rn.PT.58.46192<br>959.g | Probe: 5'-/56-<br>FAM/tgccagtgt/ZEN/gataatgcaagtccca/3IABkFQ/-3'<br>P1: 5'-ttatttctgttaaccacgatcct-3'<br>P2: 5'-caaatgctgacctggaacaag-3'                                                                                                                                                      |
| <b>B2m</b>          | ThermoFisher                | NM_01251<br>2.2  | Rn00560865_m<br>1       | Amplicon:<br>CTGCTGACCGGACCGGCACGATGGCTCGCTCG<br>GTGACCGTGATCTTTCTGGTGCTTGTCTCTCTG<br>GCCGT<br>CGTGCTTGCCATTCAGAAAACTCCCCAAATTCAA<br>GTGTACTCTCGCCATCCACCGGAGAATGGGAAG<br>CCC<br>AACTTCCTCAACTGCTACGTGTCTCAGTTCCACC<br>CACCTCAAATAGAAATTGAGCTACTGAAGAATG<br>GAA<br>AGAAGATACCAAATATCGAGATGTCA |

**Table S2.** Antibodies used for Western Blot analyses.

| Antibody | Expected Size | Protein Loaded | Antibody Dilution | Manufacturer      | Catalog #   | Host Species        | Secondary Reporter |
|----------|---------------|----------------|-------------------|-------------------|-------------|---------------------|--------------------|
| MFN1     | 70, 86kDa     | 20ug           | 1:200             | Santa Cruz        | SC50330     | Rabbit <sup>†</sup> | HRP<br>1:5000      |
| MFN2     | 50, 70kDa     | 20ug           | 1:1000            | Sigma             | M6319       | Rabbit              | HRP<br>1:5000      |
| OPA1     | 80, 100kDa    | 20ug           | 1:1000            | Cell Signaling    | 80471s      | Rabbit              | HRP<br>1:5000      |
| DRP1     | 84kDa         | 20ug           | 1:350             | Santa Cruz        | SC-32898    | Rabbit <sup>†</sup> | HRP<br>1:5000      |
| MFF      | 27,33,38kDa   | 20ug           | 1:1000            | Cell Signaling    | 84580S      | Rabbit              | HRP<br>1:5000      |
| MTFP1    | 14kDa         | 20ug           | 1:1000            | Antibodies-Online | ABIN3047683 | Rabbit              | HRP<br>1:5000      |
| DAP3     | 35kDa         | 20ug           | 1:1000            | Becton Dickinson  | 610662      | Mouse               | IRDye<br>1:5000    |
| p-DRP1   | 100, 80kDa    | 20ug           | 1:500             | Cell Signaling    | 4867S       | Rabbit              | HRP<br>1:5000      |
| Actin    | 45kDa         | 20ug           | 1:1000            | Cell Signaling    | 5125S       | Rabbit              | HRP<br>1:5000      |
| VDAC     | 39kDa         | 20ug           | 1:1000            | Abcam             | AB14734     | Mouse               | IRDye<br>1:5000    |

<sup>†</sup> Discontinued. HRP, goat anti-rabbit IgG-HRP (Southern Biotech, Birmingham, AL); IRDye (LI-COR, Lincoln, NE), donkey anti-mouse IgG IRDye 800CW.

**Table S3.** Female and male differences in expression of genes involved in mitochondrial dynamism.

| Gene        | Offspring Group     | Female             | Male               | P value      |
|-------------|---------------------|--------------------|--------------------|--------------|
|             |                     | Mean (SEM)         | Mean (SEM)         |              |
| <i>Mfn1</i> | Controls            | 0.82 (0.12)        | 0.48 (0.21)        | 0.16         |
|             | Diabetes exposed    | 0.60 (0.09)        | 0.52 (0.07)        | 0.39         |
|             | Diet exposed        | 0.69 (0.07)        | 0.63 (0.06)        | 0.58         |
|             | Combination exposed | 0.69 (0.08)        | 0.65 (0.07)        | 0.14         |
| <i>Mfn2</i> | Controls            | 0.16 (0.02)        | 0.10 (0.02)        | 0.15         |
|             | Diabetes exposed    | 0.13 (0.02)        | 0.12 (0.01)        | 0.68         |
|             | Diet exposed        | 0.15 (0.03)        | 0.15 (0.01)        | 0.98         |
|             | Combination exposed | 0.13 (0.02)        | 0.16 (0.02)        | 0.14         |
| <i>Opa1</i> | Controls            | 0.18 (0.02)        | 0.11 (0.02)        | 0.15         |
|             | Diabetes exposed    | 0.20 (0.03)        | 0.15 (0.01)        | 0.15         |
|             | Diet exposed        | 0.18 (0.03)        | 0.18 (0.02)        | 0.79         |
|             | Combination exposed | 0.19 (0.01)        | 0.16 (0.02)        | 0.46         |
| <i>Drp1</i> | Controls            | 0.12 (0.02)        | 0.07 (0.01)        | 0.07         |
|             | Diabetes exposed    | 0.11 (0.02)        | 0.09 (0.01)        | 0.26         |
|             | Diet exposed        | 0.12 (0.02)        | 0.11 (0.01)        | 0.69         |
|             | Combination exposed | <b>0.14 (0.02)</b> | <b>0.09 (0.01)</b> | <b>0.04*</b> |
| <i>Mff</i>  | Controls            | 0.14 (0.02)        | 0.11 (0.03)        | 0.46         |
|             | Diabetes exposed    | 0.13 (0.03)        | 0.10 (0.01)        | 0.37         |
|             | Diet exposed        | 0.13 (0.02)        | 0.16 (0.04)        | 0.46         |
|             | Combination exposed | 0.14 (0.02)        | 0.10 (0.01)        | 0.07         |

Whole heart mRNA levels of mitochondrial dynamism regulating genes were determined by qPCR.

Values are expressed as a mean  $\pm$  SEM expression relative to beta-2-microglobulin (*B2m*), the reference gene. Significant sex-specific differences are bolded and indicated with \* by t-test ( $p \leq 0.05$ ). N=8-9 males and 8 females/group.

**Table S4.** Summary of prenatal exposure and gender related differences in cardiac mitochondrial dynamism.

|                   |                  | Female                                                                   | Male                                                                  | Gender Differences                                                                                            |
|-------------------|------------------|--------------------------------------------------------------------------|-----------------------------------------------------------------------|---------------------------------------------------------------------------------------------------------------|
| <b>Morphology</b> | Fusion Events    | ↓ in all groups                                                          | ↓ in all groups                                                       | Diet impairs ♀ fusion more than ♂                                                                             |
|                   | Fission Events   | ↓ in all groups                                                          | ↓ in diet exposed                                                     | None, both impaired                                                                                           |
|                   | Length           | ↓ with diabetes                                                          | Trend ↓ in all                                                        | None, similar trend                                                                                           |
|                   | Width            | ↑ in all groups                                                          | Trend ↑ in all                                                        | Control ♂ wider than ♀                                                                                        |
| <b>Genes</b>      | Fusion Genes     | No difference                                                            | MFN2 ↑ in diet exposed                                                | None, similar trend                                                                                           |
|                   | Fission Genes    | No difference                                                            | No difference                                                         | Combination exposed ♀ > DRP1 than ♂                                                                           |
| <b>Proteins</b>   | Fusion Proteins  |                                                                          |                                                                       |                                                                                                               |
|                   | MFN1             | Trend ↓ in overall expression                                            | ↑ ubiquitination (inactivation of MFN1) in diet exposed               | All ♀ > expression than ♂                                                                                     |
|                   | MFN2             | ↑ in diet exposed                                                        | ↑ in diet exposed                                                     | All ♀ > expression than ♂                                                                                     |
|                   | OPA1             | No difference                                                            | ↑ long to short ratio (inactivation of OPA1) in diet exposed          | ♀ > expression than ♂ with no evidence of inactivation                                                        |
|                   | Fission Proteins |                                                                          |                                                                       |                                                                                                               |
|                   | DRP1             | ↓ Ser <sup>637</sup> phosphorylation to activate fission in diet exposed | ↑ Ser <sup>637</sup> phosphorylation to impair fission in all exposed | ♀ > expression than ♂ in combination exposed. Sex-divergent phosphorylation via DAP3 (favors mitophagy males) |
|                   | MTFP1            | No difference                                                            | ↑ in diet exposed                                                     | ♀ > expression than ♂ except in combination exposed                                                           |
|                   | DAP3             | No difference                                                            | ↑ in diet exposed                                                     | ♀ > expression than ♂ except in combination exposed                                                           |
|                   | VDAC             | No difference                                                            | No difference                                                         | All ♀ > expression than ♂                                                                                     |

Group differences are designated by ↑ for higher or ↓ for lower. ♀, female offspring hearts; ♂, male offspring hearts.

**Supplemental Figure S1.** Fusion and fission events per cell and per area to account for cell size.

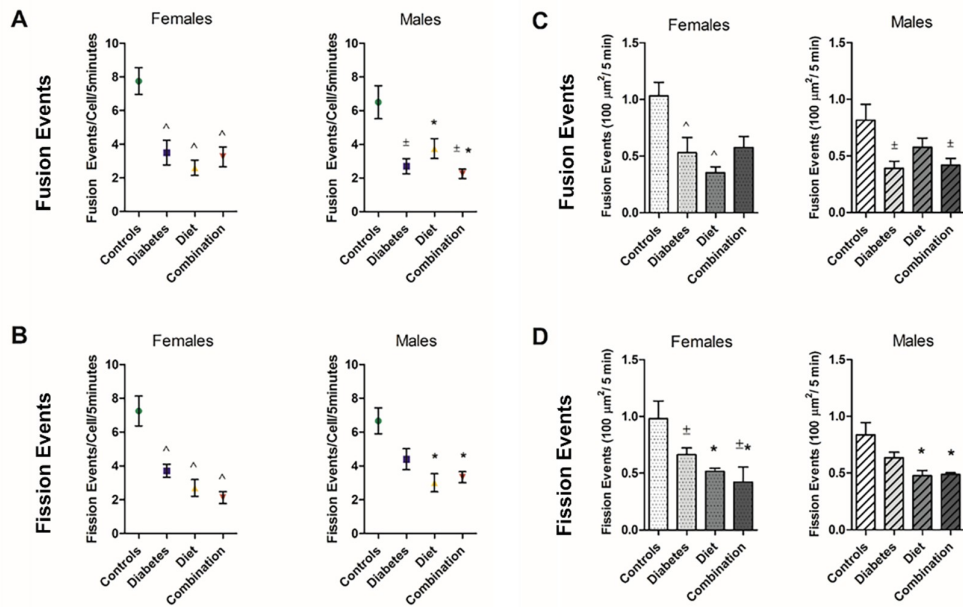

**Figure S1.** Maternal diabetes and high fat diet impair mitochondrial dynamism in newborn rat cardiomyocytes. Using confocal live cell imaging, we compared the average number of (A) fusion and (B) fission events/cell in a 5 minute recording of primary neonatal cardiomyocytes from controls and those exposed to maternal diabetes, high-fat diet, or the combination. To account for variability in cell size/image, the number of (C) fusion and (D) fission events/100μm<sup>2</sup> (10 x 10 μm square) in a 5 minute recording were also compared; the outcome remained similar. Data in A-B is the median +/- interquartile range and is the same data presented in Figure 2, but repeated here for ease of comparison between events/time and events/area/time. Data in C-D is mean +/- SEM. N=4-7/group for females and n=4-6/group for males. Significant differences (p≤0.05) are indicated with ± for diabetes effect, \* for dietary effect by two-way ANOVA and ^ for interaction with significance remaining by one-way ANOVA with Dunnett's post hoc analysis.

**Supplemental Figure S2.** Mitochondrial fission factor expression in exposed offspring hearts.

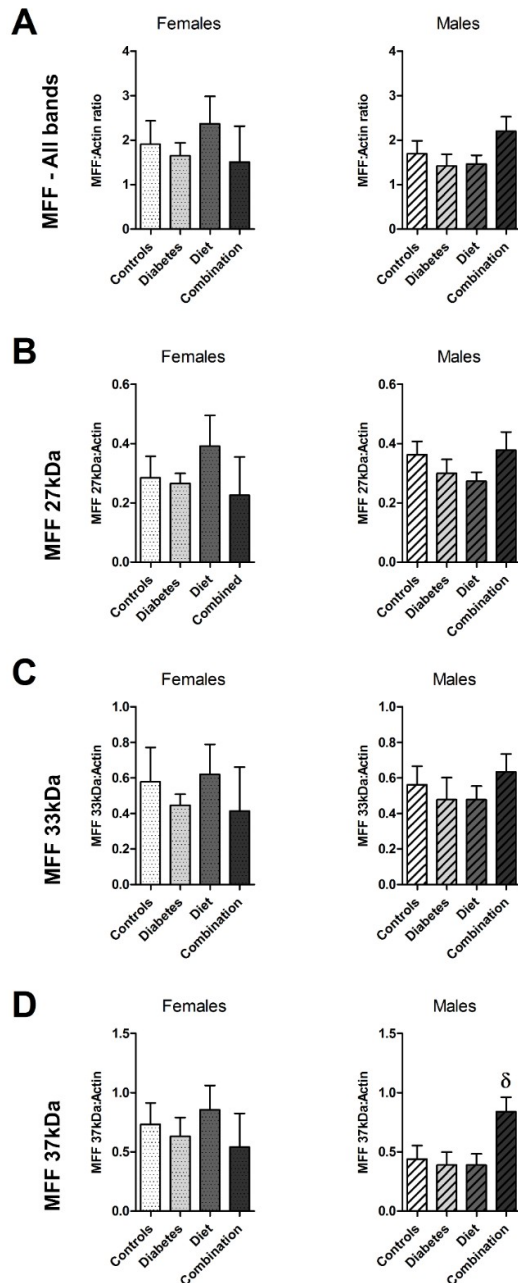

**Figure S2.** Mitochondrial fission factor (MFF) expression in newborn rat hearts. Whole heart protein lysate from control, diabetes, high-fat diet, and combination exposed newborn rats was analyzed for difference in expression of mitochondrial fission factor (MFF). MFF blots revealed three bands at 27, 33 and 37 kDa. These different size proteins likely represent known post-translational modifications known to affect function including AMPK regulated phosphorylation of MFF at Ser155 and Ser172 which regulates fission and mitophagy in response to cellular metabolic signals. While combination exposed males had a higher 37kDa MFF than females, there was no significant exposure related difference found. Data is shown for all offspring for females (n=4/group) and males (n=4/group) separately. The significant gender-related difference ( $p \leq 0.05$ ) is indicated with  $\delta$  by T-test.
